# Supplementary material for: Spatial–Temporal Change Analysis and Multi-Scenario Simulation Prediction of Land-Use Carbon Emissions in the Wuhan Urban Agglomeration, China
Source: MDPI journal article supplement (doi:10.3390/su151411021), 2023-07-14
Supplement: s1 [file s1]

# Supplementary Materials:

**Table S1.** Area of various land use types in Wuhan Urban Agglomeration in 2000.

| City (Square kilometers)  | Unused Land | Grassland | Cropland | Built-up Land | Forestland | Water   |
|---------------------------|-------------|-----------|----------|---------------|------------|---------|
| Wuhan                     | 61.94       | 72.92     | 5248.58  | 635.34        | 801.17     | 1749.19 |
| Huangshi                  | 10.09       | 210.79    | 1746.87  | 238.03        | 1895.13    | 482.10  |
| Ezhou                     | 35.15       | 37.16     | 852.74   | 137.60        | 152.67     | 380.67  |
| Xiaogan                   | 17.02       | 6.01      | 6136.17  | 408.48        | 1709.00    | 627.73  |
| Xiantao                   | 0.00        | 0.00      | 1829.91  | 281.21        | 16.18      | 410.69  |
| Xianning                  | 31.32       | 556.65    | 2961.06  | 154.57        | 5331.12    | 717.28  |
| Tianmen                   | 7.03        | 2.01      | 2056.19  | 313.55        | 28.14      | 215.07  |
| Qianjiang                 | 4.06        | 0.00      | 1583.28  | 224.59        | 24.39      | 167.68  |
| Huanggang                 | 54.30       | 551.00    | 7600.45  | 601.28        | 7621.56    | 1028.61 |
| Wuhan Urban Agglomeration | 220.91      | 1436.55   | 30015.25 | 2994.65       | 17579.36   | 5779.03 |

**Table S2.** Area of various land use types in Wuhan Urban Agglomeration in 2005.

| City (Square kilometers)  | Unused Land | Grassland | Cropland | Built-up Land | Forestland | Water   |
|---------------------------|-------------|-----------|----------|---------------|------------|---------|
| Wuhan                     | 56.94       | 66.93     | 5120.71  | 769.21        | 791.18     | 1764.18 |
| Huangshi                  | 11.09       | 204.74    | 1728.71  | 252.15        | 1893.11    | 493.20  |
| Ezhou                     | 34.15       | 34.15     | 823.61   | 142.63        | 151.67     | 409.80  |
| Xiaogan                   | 21.02       | 6.01      | 6088.12  | 419.49        | 1707.00    | 662.77  |
| Xiantao                   | 0.00        | 0.00      | 1738.87  | 281.21        | 15.17      | 502.74  |
| Xianning                  | 41.42       | 559.62    | 2919.34  | 175.77        | 5318.45    | 737.41  |
| Tianmen                   | 9.04        | 2.01      | 2055.19  | 314.56        | 27.13      | 214.06  |
| Qianjiang                 | 4.06        | 0.00      | 1572.10  | 227.63        | 24.39      | 175.81  |
| Huanggang                 | 49.27       | 543.97    | 7554.20  | 617.37        | 7620.56    | 1071.85 |
| Wuhan Urban Agglomeration | 227.00      | 1417.43   | 29600.85 | 3200.01       | 17548.65   | 6031.82 |

**Table S3.** Area of various land use types in Wuhan Urban Agglomeration in 2010.

| City (Square kilometers)  | Unused Land | Grassland | Cropland | Built-up Land | Forestland | Water   |
|---------------------------|-------------|-----------|----------|---------------|------------|---------|
| Wuhan                     | 27.07       | 65.16     | 5077.53  | 837.07        | 790.95     | 1771.37 |
| Huangshi                  | 11.09       | 207.77    | 1715.60  | 263.24        | 1887.06    | 498.24  |
| Ezhou                     | 34.15       | 33.15     | 817.59   | 149.66        | 151.67     | 409.80  |
| Xiaogan                   | 21.02       | 6.01      | 6068.09  | 433.51        | 1707.00    | 668.78  |
| Xiantao                   | 0.00        | 0.00      | 1718.64  | 285.26        | 15.17      | 518.93  |
| Xianning                  | 42.43       | 555.58    | 2900.14  | 201.02        | 5315.42    | 737.41  |
| Tianmen                   | 6.03        | 2.01      | 2048.15  | 320.59        | 26.13      | 219.09  |
| Qianjiang                 | 4.06        | 0.00      | 1555.84  | 237.80        | 28.45      | 177.84  |
| Huanggang                 | 49.27       | 544.97    | 7529.06  | 643.51        | 7612.51    | 1077.88 |
| Wuhan Urban Agglomeration | 195.13      | 1414.65   | 29430.65 | 3371.64       | 17534.36   | 6079.34 |

**Table S4.** Area of various land use types in Wuhan Urban Agglomeration in 2015.

| City (Square kilometers)  | Unused Land | Grassland | Cropland | Built-up Land | Forestland | Water   |
|---------------------------|-------------|-----------|----------|---------------|------------|---------|
| Wuhan                     | 56.94       | 62.94     | 4865.97  | 1042.92       | 778.20     | 1762.18 |
| Huangshi                  | 11.09       | 206.76    | 1692.40  | 298.54        | 1878.99    | 495.21  |
| Ezhou                     | 34.15       | 33.15     | 787.45   | 186.82        | 148.65     | 405.78  |
| Xiaogan                   | 21.02       | 5.01      | 5929.93  | 579.68        | 1695.98    | 672.79  |
| Xiantao                   | 0.00        | 0.00      | 1698.41  | 304.48        | 14.16      | 520.95  |
| Xianning                  | 32.37       | 425.41    | 4492.21  | 206.54        | 4034.43    | 561.04  |
| Tianmen                   | 5.02        | 2.01      | 2007.96  | 343.70        | 22.11      | 241.20  |
| Qianjiang                 | 4.06        | 0.00      | 1517.23  | 265.24        | 28.45      | 189.02  |
| Huanggang                 | 19.10       | 538.94    | 7429.52  | 801.37        | 7569.28    | 1098.99 |
| Wuhan Urban Agglomeration | 183.77      | 1274.20   | 30421.08 | 4029.29       | 16170.26   | 5947.16 |

Table S5. Land use carbon emissions in Wuhan Urban Agglomeration in 2000.

| City (10000 tons)         | Carbon Source | Carbon Sink | Carbon Emission |
|---------------------------|---------------|-------------|-----------------|
| Wuhan                     | 677.76        | 9.10        | 668.66          |
| Huangshi                  | 252.82        | 12.28       | 240.55          |
| Ezhou                     | 145.38        | 1.86        | 143.52          |
| Xiaogan                   | 449.47        | 11.52       | 437.95          |
| Xiantao                   | 297.54        | 1.13        | 296.40          |
| Xianning                  | 173.26        | 32.91       | 140.35          |
| Tianmen                   | 331.83        | 0.71        | 331.12          |
| Qianjiang                 | 238.23        | 0.57        | 237.66          |
| Huanggang                 | 654.51        | 47.00       | 607.50          |
| Wuhan Urban Agglomeration | 3220.79       | 117.07      | 3103.72         |

Table S6. Land use carbon emissions in Wuhan Urban Agglomeration in 2005.

| City (10000 tons)         | Carbon Source | Carbon Sink | Carbon Emission |
|---------------------------|---------------|-------------|-----------------|
| Wuhan                     | 814.42        | 9.08        | 805.35          |
| Huangshi                  | 267.22        | 12.29       | 254.93          |
| Ezhou                     | 150.38        | 1.93        | 148.46          |
| Xiaogan                   | 460.53        | 11.60       | 448.93          |
| Xiantao                   | 297.08        | 1.36        | 295.72          |
| Xianning                  | 194.79        | 32.89       | 161.91          |
| Tianmen                   | 332.86        | 0.70        | 332.16          |
| Qianjiang                 | 241.30        | 0.59        | 240.71          |
| Huanggang                 | 670.78        | 47.10       | 623.67          |
| Wuhan Urban Agglomeration | 3429.36       | 117.53      | 3311.84         |

Table S7. Land use carbon emissions in Wuhan Urban Agglomeration in 2010.

| City (10000 tons)         | Carbon Source | Carbon Sink | Carbon Emission |
|---------------------------|---------------|-------------|-----------------|
| Wuhan                     | 883.81        | 9.09        | 874.72          |
| Huangshi                  | 278.53        | 12.27       | 266.26          |
| Ezhou                     | 157.57        | 1.93        | 155.64          |
| Xiaogan                   | 474.81        | 11.61       | 463.19          |
| Xiantao                   | 301.13        | 1.40        | 299.73          |
| Xianning                  | 220.60        | 32.87       | 187.73          |
| Tianmen                   | 339.01        | 0.71        | 338.30          |
| Qianjiang                 | 251.64        | 0.62        | 251.03          |
| Huanggang                 | 697.47        | 47.07       | 650.39          |
| Wuhan Urban Agglomeration | 3604.57       | 117.56      | 3487.00         |

Table S8. Land use carbon emissions in Wuhan Urban Agglomeration in 2015.

| City (10000 tons)         | Carbon Source | Carbon Sink | Carbon Emission |
|---------------------------|---------------|-------------|-----------------|
| Wuhan                     | 1093.91       | 9.00        | 1084.91         |
| Huangshi                  | 314.62        | 12.21       | 302.41          |
| Ezhou                     | 195.53        | 1.90        | 193.64          |
| Xiaogan                   | 624.05        | 11.56       | 612.49          |
| Xiantao                   | 320.75        | 1.40        | 319.34          |
| Xianning                  | 234.17        | 24.95       | 209.22          |
| Tianmen                   | 362.52        | 0.74        | 361.78          |
| Qianjiang                 | 279.59        | 0.64        | 278.95          |
| Huanggang                 | 858.89        | 46.87       | 812.02          |
| Wuhan Urban Agglomeration | 4284.03       | 109.27      | 4174.76         |

Table S9. Area of various land use types in Wuhan Urban Agglomeration in 2017.

| City (Square kilometers)  | Unused Land | Grassland | Cropland | Built-up Land | Forestland | Water   |
|---------------------------|-------------|-----------|----------|---------------|------------|---------|
| Wuhan                     | 326.54      | 187.42    | 2277.47  | 1878.15       | 1860.41    | 2039.16 |
| Huangshi                  | 225.03      | 140.88    | 794.96   | 761.36        | 1999.63    | 661.15  |
| Ezhou                     | 40.04       | 21.54     | 412.75   | 346.56        | 285.97     | 489.12  |
| Xiaogan                   | 358.23      | 101.09    | 3939.15  | 1133.95       | 2317.46    | 1054.53 |
| Xiantao                   | 24.22       | 27.66     | 1422.07  | 317.92        | 66.58      | 679.56  |
| Xianning                  | 387.16      | 226.56    | 1097.91  | 853.49        | 6203.88    | 983.00  |
| Tianmen                   | 54.94       | 5.51      | 1948.50  | 313.56        | 61.04      | 238.44  |
| Qianjiang                 | 38.22       | 20.71     | 1262.36  | 253.31        | 32.02      | 397.39  |
| Huanggang                 | 1182.89     | 531.92    | 2748.22  | 2323.41       | 9184.25    | 1486.50 |
| Wuhan Urban Agglomeration | 2637.26     | 1263.30   | 15903.41 | 8181.72       | 22011.22   | 8028.84 |

Table S10. Area of various land use types in Wuhan Urban Agglomeration in 2018.

| City (Square kilometers)  | Unused Land | Grassland | Cropland | Built-up Land | Forestland | Water   |
|---------------------------|-------------|-----------|----------|---------------|------------|---------|
| Wuhan                     | 343.63      | 187.53    | 2106.85  | 1952.40       | 2089.84    | 1888.91 |
| Huangshi                  | 144.48      | 78.55     | 644.91   | 831.38        | 2292.69    | 590.99  |
| Ezhou                     | 37.74       | 34.18     | 347.66   | 384.17        | 380.65     | 411.61  |
| Xiaogan                   | 309.54      | 65.93     | 4402.95  | 1274.87       | 1917.73    | 933.38  |
| Xiantao                   | 10.69       | 22.92     | 1568.80  | 341.54        | 30.59      | 563.46  |
| Xianning                  | 202.29      | 149.86    | 1023.33  | 905.82        | 6606.10    | 864.61  |
| Tianmen                   | 20.75       | 8.13      | 1832.60  | 474.33        | 34.87      | 251.32  |
| Qianjiang                 | 10.18       | 5.30      | 1043.49  | 325.32        | 23.90      | 595.80  |
| Huanggang                 | 866.61      | 186.15    | 2539.79  | 2454.79       | 10172.36   | 1237.49 |
| Wuhan Urban Agglomeration | 1945.91     | 738.56    | 15510.37 | 8944.62       | 23548.75   | 7337.56 |

Table S11. Area of various land use types in Wuhan Urban Agglomeration in 2019.

| City (Square kilometers)  | Unused Land | Grassland | Cropland | Built-up Land | Forestland | Water   |
|---------------------------|-------------|-----------|----------|---------------|------------|---------|
| Wuhan                     | 202.67      | 330.96    | 1715.76  | 2047.73       | 2150.62    | 2121.41 |
| Huangshi                  | 103.14      | 132.83    | 675.84   | 876.12        | 2083.04    | 712.03  |
| Ezhou                     | 17.86       | 58.70     | 317.16   | 370.88        | 308.66     | 522.75  |
| Xiaogan                   | 309.24      | 107.89    | 2959.66  | 1425.39       | 3170.95    | 931.28  |
| Xiantao                   | 3.21        | 38.68     | 1314.22  | 346.17        | 194.69     | 641.02  |
| Xianning                  | 148.94      | 246.98    | 951.96   | 1006.80       | 6518.39    | 878.93  |
| Tianmen                   | 12.31       | 31.67     | 1746.77  | 455.18        | 177.51     | 198.56  |
| Qianjiang                 | 7.25        | 20.30     | 1278.13  | 335.42        | 127.40     | 235.50  |
| Huanggang                 | 522.65      | 375.27    | 2713.01  | 2970.99       | 9243.95    | 1631.33 |
| Wuhan Urban Agglomeration | 1327.27     | 1343.28   | 13672.51 | 9834.68       | 23975.21   | 7872.81 |

Table S12. Area of various land use types in Wuhan Urban Agglomeration in 2020.

| City (Square kilometers)  | Unused Land | Grassland | Cropland | Built-up Land | Forestland | Water   |
|---------------------------|-------------|-----------|----------|---------------|------------|---------|
| Wuhan                     | 405.86      | 173.24    | 1503.73  | 1975.92       | 2319.24    | 2191.15 |
| Huangshi                  | 210.49      | 79.92     | 573.29   | 814.17        | 2222.70    | 682.44  |
| Ezhou                     | 39.77       | 23.14     | 292.83   | 362.42        | 384.86     | 492.98  |
| Xiaogan                   | 563.44      | 166.00    | 2472.52  | 1413.43       | 2923.27    | 1365.73 |
| Xiantao                   | 23.26       | 18.68     | 1206.42  | 358.98        | 87.76      | 842.90  |
| Xianning                  | 362.04      | 120.23    | 885.64   | 972.19        | 6471.62    | 940.28  |
| Tianmen                   | 68.43       | 12.71     | 1662.76  | 462.18        | 109.74     | 306.19  |
| Qianjiang                 | 21.48       | 17.76     | 1193.33  | 326.47        | 71.81      | 373.15  |
| Huanggang                 | 1314.32     | 331.54    | 2230.99  | 2583.80       | 9474.05    | 1522.49 |
| Wuhan Urban Agglomeration | 3009.10     | 943.22    | 12021.51 | 9269.56       | 24065.05   | 8717.32 |

Table S13. Area of various land use types in Wuhan Urban Agglomeration in 2021.

| City (Square kilometers)  | Unused Land | Grassland | Cropland | Built-up Land | Forestland | Water   |
|---------------------------|-------------|-----------|----------|---------------|------------|---------|
| Wuhan                     | 139.72      | 448.79    | 847.73   | 2004.92       | 2781.27    | 2346.72 |
| Huangshi                  | 71.74       | 168.03    | 344.49   | 761.53        | 2586.77    | 650.43  |
| Ezhou                     | 21.53       | 67.59     | 128.78   | 344.13        | 529.62     | 504.35  |
| Xiaogan                   | 295.70      | 387.80    | 2822.19  | 1322.20       | 2749.84    | 1326.68 |
| Xiantao                   | 16.51       | 98.30     | 1186.80  | 367.89        | 62.48      | 806.03  |
| Xianning                  | 108.92      | 219.38    | 545.24   | 960.68        | 6985.07    | 932.71  |
| Tianmen                   | 44.39       | 25.70     | 1772.46  | 483.39        | 25.30      | 270.76  |
| Qianjiang                 | 16.73       | 13.94     | 1026.59  | 336.23        | 15.66      | 594.85  |
| Huanggang                 | 518.04      | 680.49    | 1501.05  | 2432.40       | 10781.82   | 1543.42 |
| Wuhan Urban Agglomeration | 1233.53     | 2109.82   | 10178.54 | 9013.51       | 26515.91   | 8974.44 |

Table S14. Area of various land use types in Wuhan Urban Agglomeration in 2022.

| City (Square kilometers)  | Unused Land | Grassland | Cropland | Built-up Land | Forestland | Water   |
|---------------------------|-------------|-----------|----------|---------------|------------|---------|
| Wuhan                     | 233.14      | 172.01    | 1633.76  | 2170.23       | 2391.45    | 1968.56 |
| Huangshi                  | 157.01      | 70.53     | 556.78   | 864.68        | 2343.49    | 590.52  |
| Ezhou                     | 49.27       | 15.09     | 286.78   | 398.16        | 418.05     | 428.65  |
| Xiaogan                   | 399.97      | 202.50    | 3097.61  | 1533.75       | 2546.37    | 1124.21 |
| Xiantao                   | 16.94       | 31.67     | 1306.34  | 429.26        | 122.61     | 631.18  |
| Xianning                  | 223.09      | 138.12    | 994.21   | 1084.43       | 6547.03    | 765.13  |
| Tianmen                   | 71.56       | 15.88     | 1625.49  | 559.25        | 94.00      | 255.82  |
| Qianjiang                 | 14.43       | 10.37     | 1177.14  | 396.09        | 117.80     | 288.18  |
| Huanggang                 | 861.26      | 175.17    | 2548.92  | 2771.56       | 9861.90    | 1238.40 |
| Wuhan Urban Agglomeration | 2026.66     | 831.33    | 13227.01 | 10207.40      | 24442.70   | 7290.65 |

Table S15. Land use carbon emissions in Wuhan Urban Agglomeration in 2017.

| City (10000 tons)         | Carbon Source | Carbon Sink | Carbon Emission |
|---------------------------|---------------|-------------|-----------------|
| Wuhan                     | 1937.74       | 16.02       | 1921.72         |
| Huangshi                  | 784.88        | 13.33       | 771.55          |
| Ezhou                     | 357.52        | 2.91        | 354.62          |
| Xiaogan                   | 1182.67       | 16.17       | 1166.50         |
| Xiantao                   | 333.16        | 2.11        | 331.04          |
| Xianning                  | 880.88        | 38.60       | 842.28          |
| Tianmen                   | 331.31        | 0.96        | 330.34          |
| Qianjiang                 | 266.09        | 1.20        | 264.89          |
| Huanggang                 | 2396.78       | 57.29       | 2339.49         |
| Wuhan Urban Agglomeration | 8471.03       | 148.60      | 8322.43         |

Table S16. Land use carbon emissions in Wuhan Urban Agglomeration in 2018.

| City (10000 tons)         | Carbon Source | Carbon Sink | Carbon Emission |
|---------------------------|---------------|-------------|-----------------|
| Wuhan                     | 2013.05       | 16.98       | 1996.07         |
| Huangshi                  | 855.95        | 14.84       | 841.11          |
| Ezhou                     | 395.77        | 3.26        | 392.51          |
| Xiaogan                   | 1329.52       | 13.53       | 1315.99         |
| Xiantao                   | 358.11        | 1.61        | 356.50          |
| Xianning                  | 934.19        | 40.61       | 893.58          |
| Tianmen                   | 495.63        | 0.84        | 494.79          |
| Qianjiang                 | 338.87        | 1.65        | 337.22          |
| Huanggang                 | 2530.50       | 62.31       | 2468.18         |
| Wuhan Urban Agglomeration | 9251.58       | 155.63      | 9095.95         |

Table S17. Land use carbon emissions in Wuhan Urban Agglomeration in 2019.

| City (10000 tons)         | Carbon Source | Carbon Sink | Carbon Emission |
|---------------------------|---------------|-------------|-----------------|
| Wuhan                     | 2108.88       | 17.94       | 2090.94         |
| Huangshi                  | 901.99        | 13.94       | 888.06          |
| Ezhou                     | 381.98        | 3.13        | 378.85          |
| Xiaogan                   | 1476.73       | 20.82       | 1455.92         |
| Xiantao                   | 361.60        | 2.76        | 358.84          |
| Xianning                  | 1037.40       | 40.15       | 997.25          |
| Tianmen                   | 475.56        | 1.54        | 474.02          |
| Qianjiang                 | 350.39        | 1.34        | 349.05          |
| Huanggang                 | 3060.83       | 57.94       | 3002.89         |
| Wuhan Urban Agglomeration | 10155.38      | 159.56      | 9995.82         |

Table S18. Land use carbon emissions in Wuhan Urban Agglomeration in 2020.

| City (10000 tons)         | Carbon Source | Carbon Sink | Carbon Emission |
|---------------------------|---------------|-------------|-----------------|
| Wuhan                     | 2034.17       | 19.08       | 2015.10         |
| Huangshi                  | 837.94        | 14.67       | 823.27          |
| Ezhou                     | 373.19        | 3.49        | 369.70          |
| Xiaogan                   | 1462.05       | 20.50       | 1441.55         |
| Xiantao                   | 374.20        | 2.65        | 371.56          |
| Xianning                  | 1001.58       | 40.02       | 961.56          |
| Tianmen                   | 482.32        | 1.42        | 480.90          |
| Qianjiang                 | 340.79        | 1.37        | 339.42          |
| Huanggang                 | 2661.29       | 59.03       | 2602.26         |
| Wuhan Urban Agglomeration | 9567.53       | 162.22      | 9405.31         |

Table S19. Land use carbon emissions in Wuhan Urban Agglomeration in 2021.

| City (10000 tons)         | Carbon Source | Carbon Sink | Carbon Emission |
|---------------------------|---------------|-------------|-----------------|
| Wuhan                     | 2060.66       | 22.20       | 2038.46         |
| Huangshi                  | 782.81        | 16.71       | 766.10          |
| Ezhou                     | 353.61        | 4.37        | 349.24          |
| Xiaogan                   | 1370.21       | 19.43       | 1350.78         |
| Xiantao                   | 383.24        | 2.42        | 380.81          |
| Xianning                  | 988.08        | 42.99       | 945.09          |
| Tianmen                   | 504.62        | 0.84        | 503.78          |
| Qianjiang                 | 349.97        | 1.60        | 348.37          |
| Huanggang                 | 2502.37       | 66.72       | 2435.65         |
| Wuhan Urban Agglomeration | 9295.75       | 177.27      | 9118.48         |

Table S20. Land use carbon emissions in Wuhan Urban Agglomeration in 2022.

| City (10000 tons)         | Carbon Source | Carbon Sink | Carbon Emission |
|---------------------------|---------------|-------------|-----------------|
| Wuhan                     | 2234.13       | 18.92       | 2215.21         |
| Huangshi                  | 889.67        | 15.13       | 874.53          |
| Ezhou                     | 409.82        | 3.52        | 406.30          |
| Xiaogan                   | 1588.56       | 17.70       | 1570.86         |
| Xiantao                   | 446.79        | 2.32        | 444.47          |
| Xianning                  | 1117.25       | 40.01       | 1077.23         |
| Tianmen                   | 581.70        | 1.20        | 580.50          |
| Qianjiang                 | 412.12        | 1.42        | 410.70          |
| Huanggang                 | 2855.45       | 60.51       | 2794.94         |
| Wuhan Urban Agglomeration | 10535.47      | 160.73      | 10374.74        |

Table S21. Land use carbon emissions in Wuhan Urban Agglomeration in 2035 under natural development scenario.

| City (Square kilometers)  | Unused Land | Grassland | Cropland | Built-up Land | Forestland | Water   |
|---------------------------|-------------|-----------|----------|---------------|------------|---------|
| Wuhan                     | 334.71      | 155.34    | 1332.07  | 1541.49       | 3103.83    | 2101.70 |
| Huangshi                  | 224.29      | 136.95    | 627.82   | 598.50        | 2326.59    | 668.86  |
| Ezhou                     | 39.22       | 19.03     | 249.80   | 269.64        | 514.39     | 503.91  |
| Xiaogan                   | 372.63      | 88.66     | 1661.33  | 1297.33       | 4286.69    | 1197.77 |
| Xiantao                   | 24.05       | 22.24     | 995.91   | 498.95        | 236.62     | 760.24  |
| Xianning                  | 386.89      | 226.03    | 1030.17  | 866.35        | 6248.91    | 993.65  |
| Tianmen                   | 54.30       | 4.85      | 828.04   | 1099.24       | 367.24     | 268.33  |
| Qianjiang                 | 37.39       | 13.53     | 837.36   | 521.00        | 129.82     | 464.91  |
| Huanggang                 | 1226.36     | 403.56    | 1390.25  | 1421.12       | 11494.34   | 1521.58 |
| Wuhan Urban Agglomeration | 2699.83     | 1070.20   | 8952.75  | 8113.61       | 28708.43   | 8480.95 |

Table S22. Land use carbon emissions in Wuhan Urban Agglomeration in 2035 under low-carbon development scenario.

| City (Square kilometers)  | Unused Land | Grassland | Cropland | Built-up Land | Forestland | Water   |
|---------------------------|-------------|-----------|----------|---------------|------------|---------|
| Wuhan                     | 316.28      | 167.68    | 1260.48  | 1401.95       | 3333.30    | 2089.47 |
| Huangshi                  | 221.91      | 138.44    | 620.47   | 562.79        | 2372.36    | 667.03  |
| Ezhou                     | 38.48       | 19.81     | 243.15   | 238.17        | 555.92     | 500.46  |
| Xiaogan                   | 342.40      | 99.50     | 1500.01  | 1060.19       | 4731.92    | 1170.39 |
| Xiantao                   | 24.08       | 22.85     | 969.55   | 444.47        | 333.67     | 743.38  |
| Xianning                  | 386.92      | 226.31    | 1021.77  | 861.97        | 6263.72    | 991.32  |
| Tianmen                   | 54.58       | 5.03      | 785.13   | 989.18        | 526.44     | 261.65  |
| Qianjiang                 | 37.97       | 13.94     | 817.18   | 488.87        | 198.84     | 447.21  |
| Huanggang                 | 1113.35     | 461.35    | 1284.70  | 1205.47       | 11878.20   | 1514.13 |
| Wuhan Urban Agglomeration | 2537.37     | 1155.30   | 8493.95  | 7248.81       | 30208.27   | 8382.07 |

**Table S23.** Land use carbon emissions in Wuhan Urban Agglomeration in 2035 under economic development scenario.

| City (Square kilometers)  | Unused Land | Grassland | Cropland | Built-up Land | Forestland | Water   |
|---------------------------|-------------|-----------|----------|---------------|------------|---------|
| Wuhan                     | 323.66      | 175.10    | 1445.29  | 1847.19       | 2674.07    | 2103.84 |
| Huangshi                  | 224.30      | 138.69    | 644.00   | 700.45        | 2206.43    | 669.13  |
| Ezhou                     | 39.64       | 20.03     | 264.32   | 339.43        | 428.48     | 504.11  |
| Xiaogan                   | 355.82      | 103.84    | 1964.58  | 1756.81       | 3518.31    | 1205.06 |
| Xiantao                   | 24.19       | 23.18     | 1036.66  | 564.53        | 128.20     | 761.24  |
| Xianning                  | 387.15      | 226.57    | 1038.51  | 872.95        | 6233.12    | 993.69  |
| Tianmen                   | 54.84       | 5.23      | 895.39   | 1212.22       | 185.09     | 269.23  |
| Qianjiang                 | 38.12       | 14.21     | 863.07   | 557.03        | 64.68      | 466.89  |
| Huanggang                 | 1164.56     | 476.19    | 1510.70  | 1884.88       | 10895.79   | 1525.09 |
| Wuhan Urban Agglomeration | 2613.76     | 1183.45   | 9654.14  | 9731.44       | 26347.82   | 8495.15 |

**Table S24.** Land use carbon emissions in Wuhan Urban Agglomeration in 2035 under cropland protection scenario.

| City (Square kilometers)  | Unused Land | Grassland | Cropland | Built-up Land | Forestland | Water   |
|---------------------------|-------------|-----------|----------|---------------|------------|---------|
| Wuhan                     | 314.82      | 173.30    | 2172.73  | 1863.60       | 2009.64    | 2035.08 |
| Huangshi                  | 221.54      | 139.56    | 772.12   | 756.92        | 2033.01    | 659.86  |
| Ezhou                     | 38.18       | 20.37     | 394.22   | 343.94        | 311.21     | 488.07  |
| Xiaogan                   | 339.87      | 94.83     | 3683.70  | 1174.75       | 2551.58    | 1059.67 |
| Xiantao                   | 23.65       | 24.53     | 1407.70  | 330.18        | 68.75      | 683.19  |
| Xianning                  | 386.65      | 226.14    | 1093.60  | 852.34        | 6210.56    | 982.70  |
| Tianmen                   | 52.97       | 5.11      | 1875.98  | 379.18        | 70.85      | 237.92  |
| Qianjiang                 | 36.94       | 18.04     | 1266.28  | 263.48        | 32.40      | 386.85  |
| Huanggang                 | 1119.11     | 476.72    | 2605.32  | 2239.19       | 9547.92    | 1468.94 |
| Wuhan Urban Agglomeration | 2535.16     | 1178.97   | 15260.73 | 8203.85       | 22847.20   | 7999.86 |
